# Supplementary material for: Vaccination against COVID-19: insight from arterial and venous thrombosis occurrence using data from VigiBase
Source: PubMed Central journal article supplement — Eur Respir J. 2021 Jul 1;58(1):2100956. doi: 10.1183/13993003.00956-2021 (PMC8051185; doi:10.1183/13993003.00956-2021), 2021-07-01

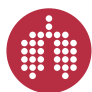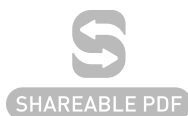

# Vaccination against COVID-19: insight from arterial and venous thrombosis occurrence using data from VigiBase

David M. Smadja <sup>1,2,3</sup>, Qun-Ying Yue <sup>4</sup>, Richard Chocron <sup>5</sup>, Olivier Sanchez <sup>1,3,6</sup> and Agnes Lillo-Le Louet <sup>1,7</sup>

<sup>1</sup>Université de Paris, Innovative Therapies in Hemostasis, INSERM, Paris, France. <sup>2</sup>Hematology Dept and Biosurgical Research Lab (Carpentier Foundation), Assistance Publique Hôpitaux de Paris-Centre (APHP-CUP), Paris, France. <sup>3</sup>F-CRIN INNOVTE Network, Saint Etienne, France. <sup>4</sup>Uppsala Monitoring Centre, Uppsala, Sweden. <sup>5</sup>Emergency Dept, Université de Paris, PARCC, INSERM U970, AP-HP-Centre Université de Paris (APHP-CUP), Paris, France. <sup>6</sup>Respiratory Medicine Dept and Biosurgical Research Lab (Carpentier Foundation), Assistance Publique Hôpitaux de Paris-Centre (APHP-CUP), Paris, France. <sup>7</sup>Pharmacovigilance Dept, Assistance Publique Hôpitaux de Paris-Centre (APHP-CUP), Paris, France.

David M. Smadja ([david.smadja@aphp.fr](mailto:david.smadja@aphp.fr))

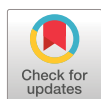

Shareable abstract (@ERSpublications)

**This study observed an imbalance between venous and arterial thrombotic events in mRNA vaccines while with AZ1222 they are evenly shared. Our analysis highlights cerebral vein thrombosis with the three vaccines.** <https://bit.ly/3mZqguE>

**Cite this article as:** Smadja DM, Yue Q-Y, Chocron R, *et al.* Vaccination against COVID-19: insight from arterial and venous thrombosis occurrence using data from VigiBase. *Eur Respir J* 2021; 58: 2100956 [DOI: 10.1183/13993003.00956-2021].

This single-page version can be shared freely online.

Copyright ©The authors 2021.

This version is distributed under the terms of the Creative Commons Attribution Non-Commercial Licence 4.0. For commercial reproduction rights and permissions contact [permissions@ersnet.org](mailto:permissions@ersnet.org)

This article has an editorial commentary: <https://doi.org/10.1183/13993003.01111-2021>

Received: 31 March 2021  
Accepted: 13 April 2021

*To the Editor:*

Coronavirus disease 2019 (COVID-19) is associated with a prothrombotic phenotype characterised by coagulopathy and endothelial dysfunction [1–4]. Following some cases of thrombosis after vaccination, the Oxford–AstraZeneca COVID-19 vaccine (AZD1222) was temporarily suspended by some European countries. The European Medicines Agency concluded that the benefits of the vaccine in combating the COVID-19 outbreak continue to outweigh the risk of side-effects. On 19 March, 2021, Germany reported 13 cases of sinus or cerebral vein thrombosis, with more than 1.6 million AstraZeneca COVID-19 vaccine doses administered. Some of these patients also had a heparin-induced thrombocytopenia (HIT)-like syndrome, which suggests an immunological event as one of the potential origins of thrombosis.

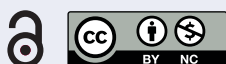

Supplement: ERJ-00956-2021.Shareable.pdf [file ERJ-00956-2021.Shareable.pdf]
